# Supplementary material for: Multidrug resistance and extended-spectrum β-lactamases genes among Escherichia coli from patients with urinary tract infections in Northwestern Libya
Source: PubMed Central journal article supplement — Libyan J Med. 2015 Feb 2;10:10.3402/ljm.v10.26412. doi: 10.3402/ljm.v10.26412 (PMC4315781; doi:10.3402/ljm.v10.26412), 2015-02-02
Supplement: LJM-10-26412-s001.pdf [file LJM-10-26412-s001.pdf]

Supplemental table. Distribution of extended-spectrum  $\beta$ -lactamases (ESBLs) genes among 14 phenotypically ESBL-positive *Escherichia coli* from patients with urinary tract infections

| No. | ESBLs genes               |                           |                           |                             |
|-----|---------------------------|---------------------------|---------------------------|-----------------------------|
|     | <i>bla</i> <sub>TEM</sub> | <i>bla</i> <sub>SHV</sub> | <i>bla</i> <sub>OXA</sub> | <i>bla</i> <sub>CTX-M</sub> |
| 1   | +                         | —                         | +                         | +                           |
| 2   | —                         | —                         | +                         | —                           |
| 3   | +                         | —                         | —                         | +                           |
| 4   | —                         | —                         | +                         | —                           |
| 5   | +                         | —                         | +                         | +                           |
| 6   | +                         | —                         | —                         | +                           |
| 7   | +                         | —                         | —                         | —                           |
| 8   | —                         | —                         | +                         | —                           |
| 9   | —                         | —                         | —                         | —                           |
| 10  | —                         | —                         | +                         | —                           |
| 11  | —                         | —                         | +                         | +                           |
| 12  | —                         | —                         | +                         | —                           |
| 13  | +                         | —                         | +                         | +                           |
| 14  | +                         | —                         | +                         | —                           |

+ = Present, — = Absent.
